# Supplementary material
Source: PubMed Central journal article supplement (PMC4049626)
Supplement: NIHMS582827-supplement-02.pdf [file NIHMS582827-supplement-02.pdf]

Figure S1

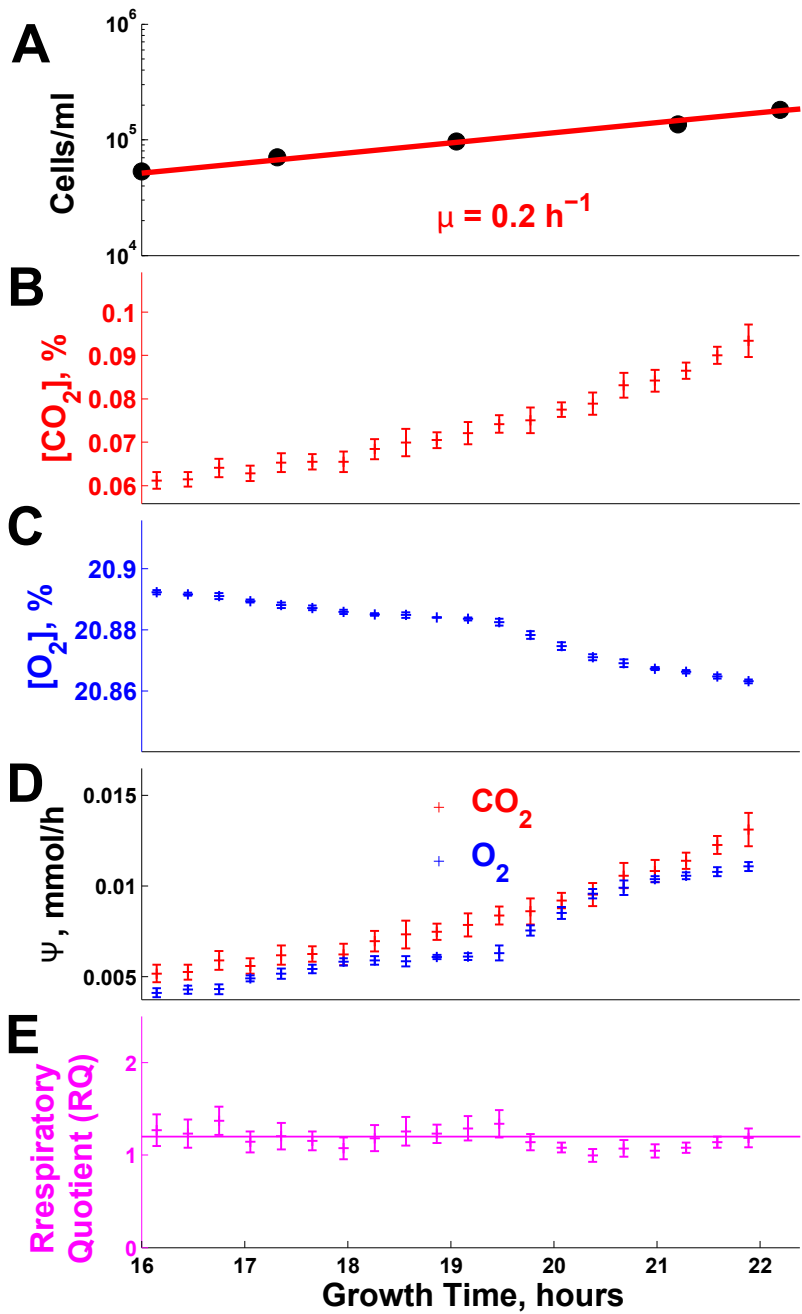

Figure S2

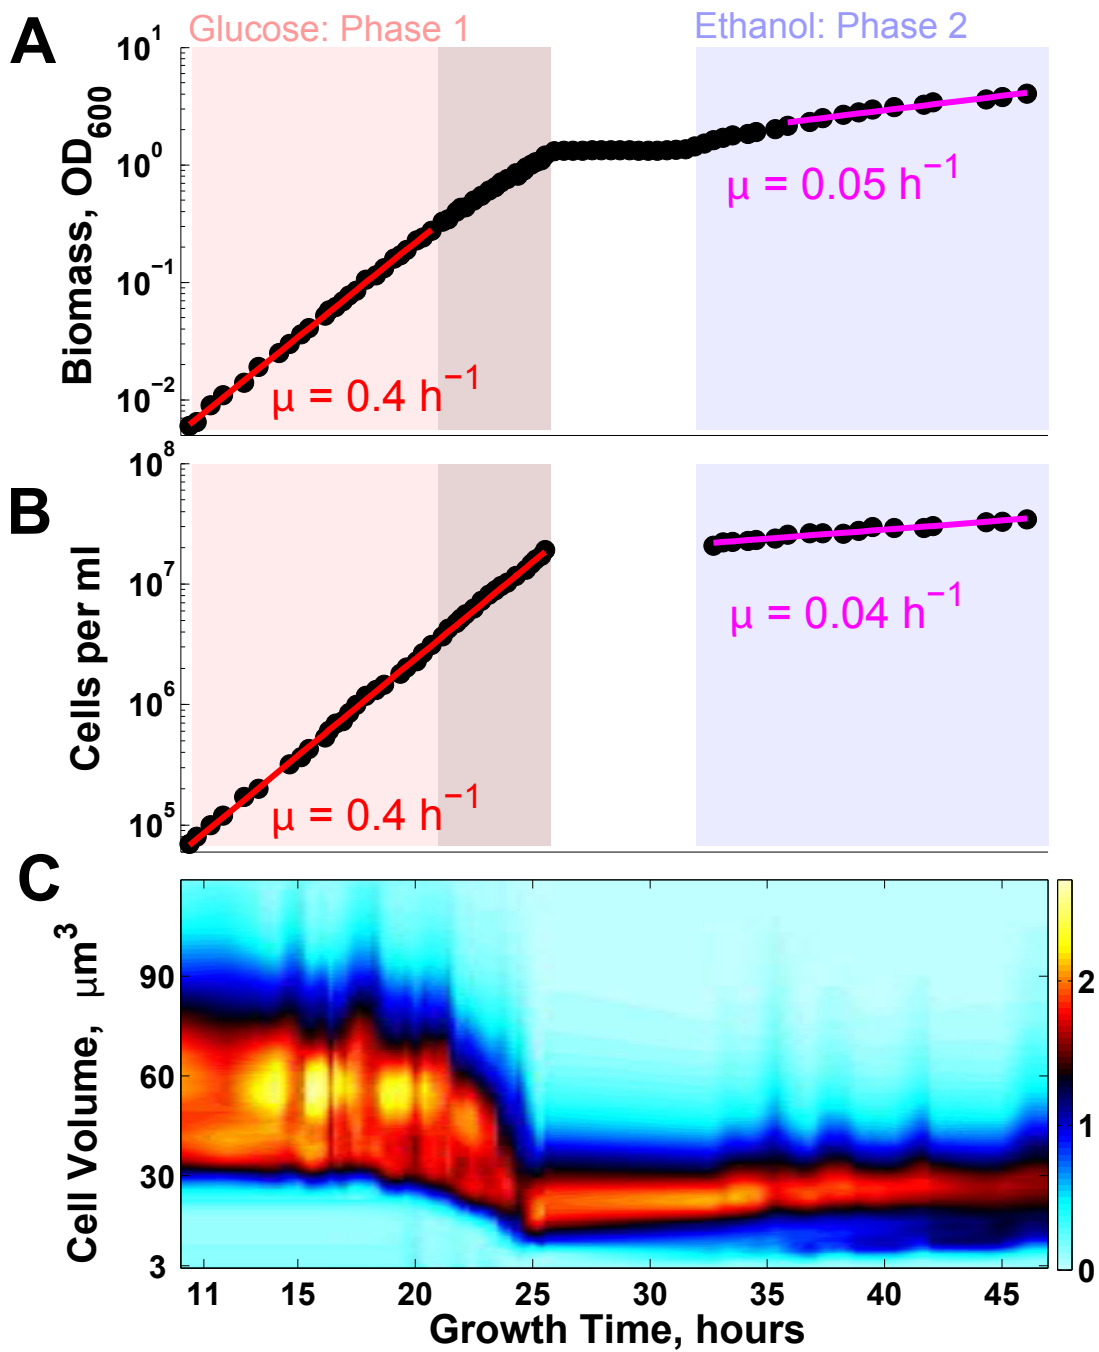

**Figure S3**

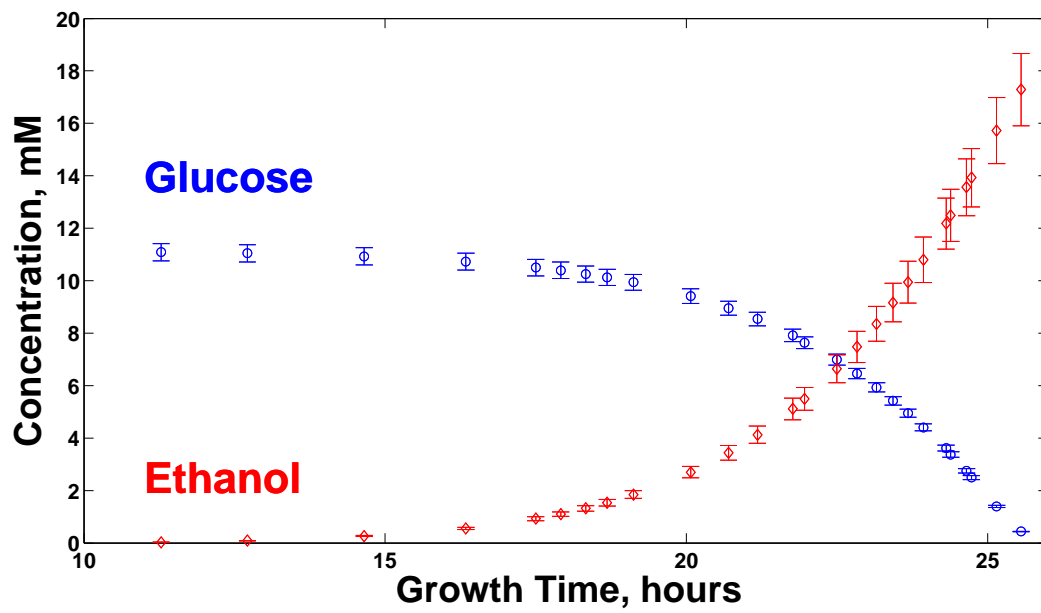

Figure S4

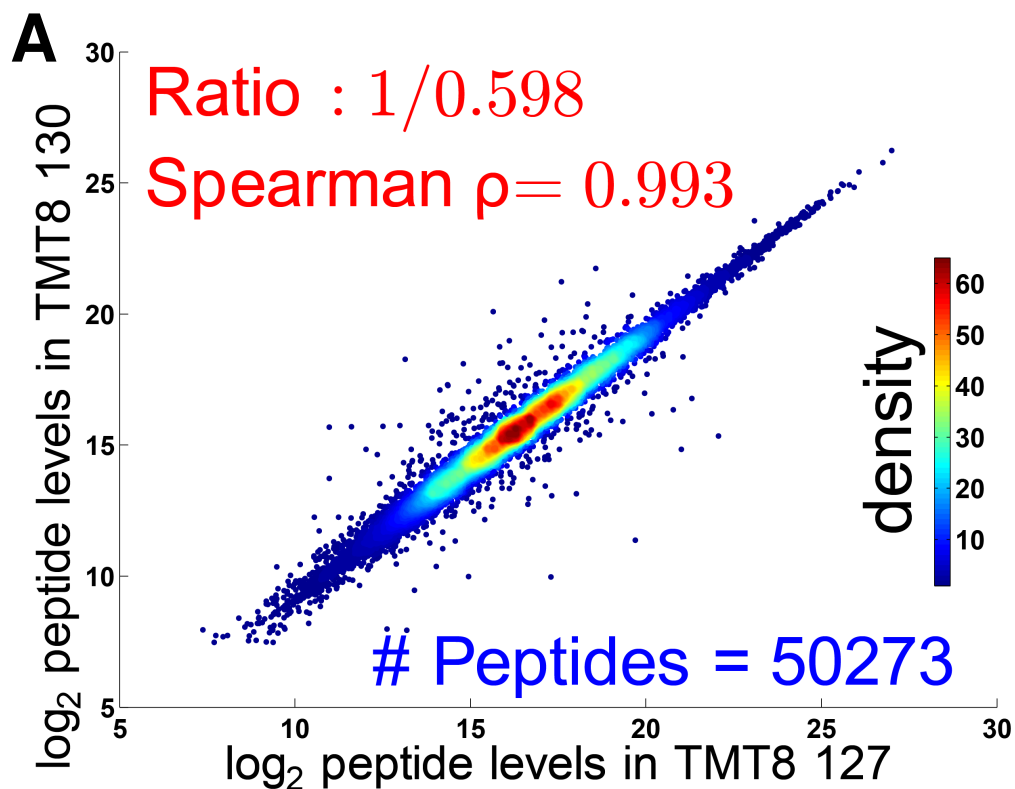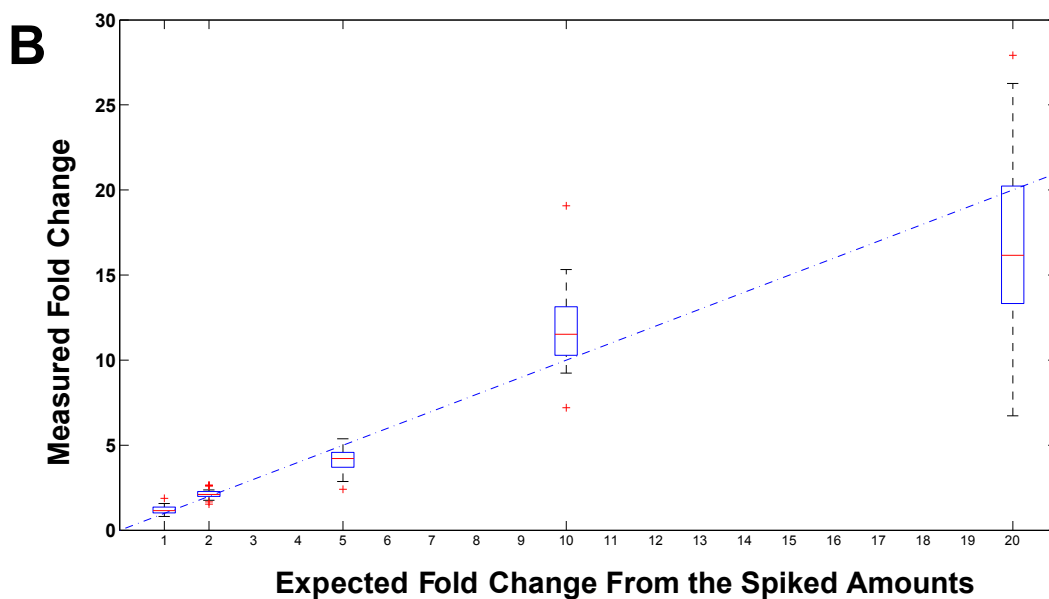

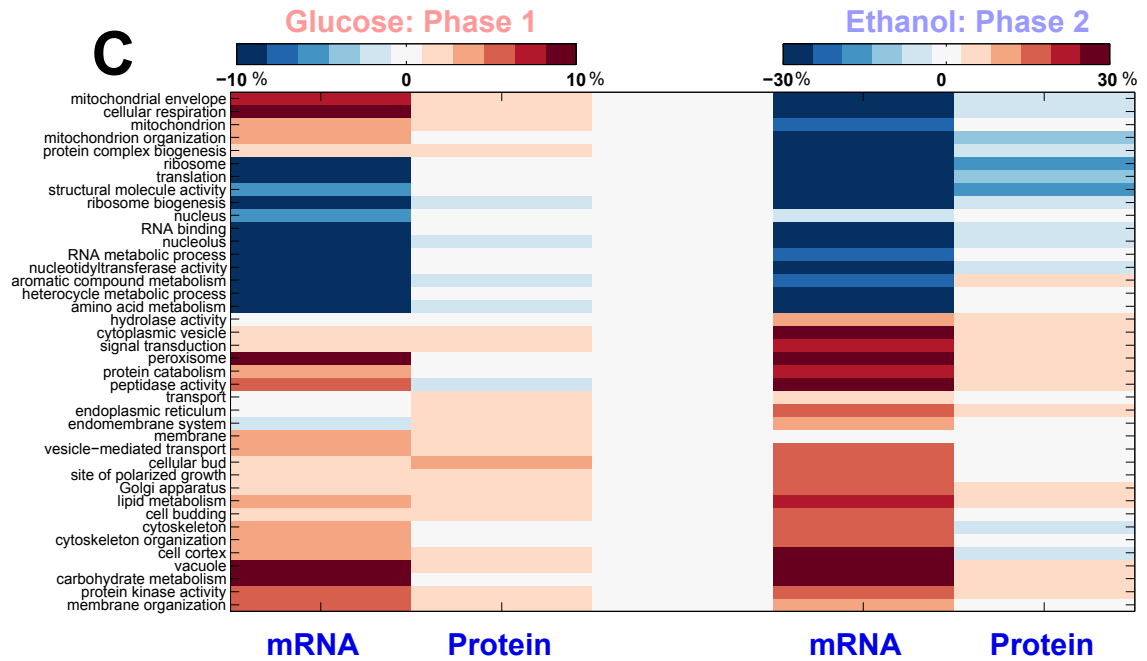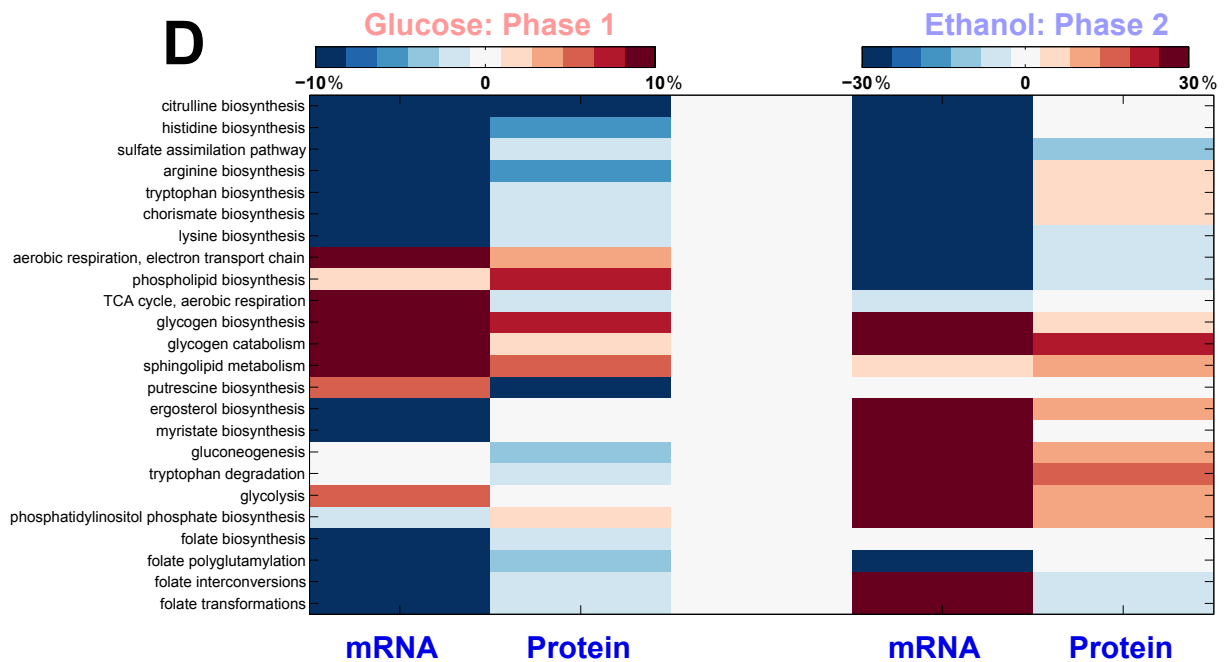

Figure S5

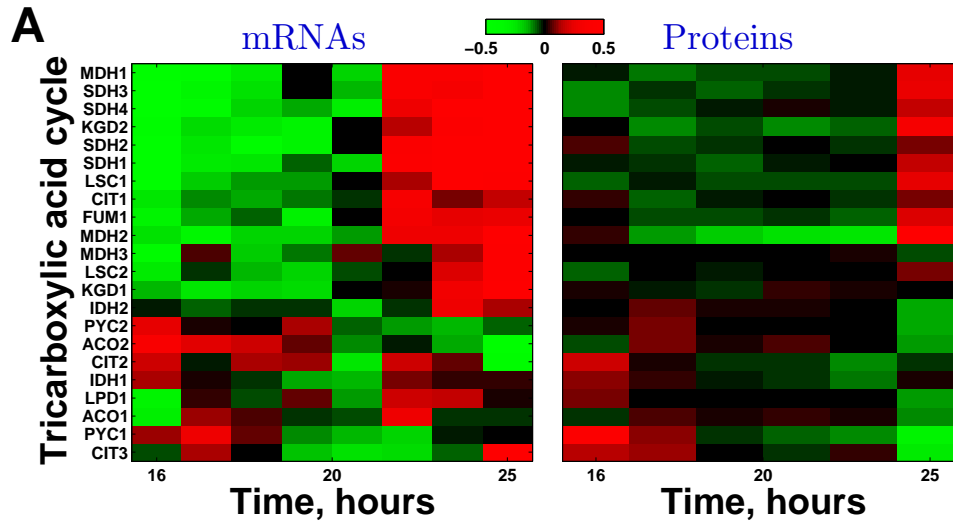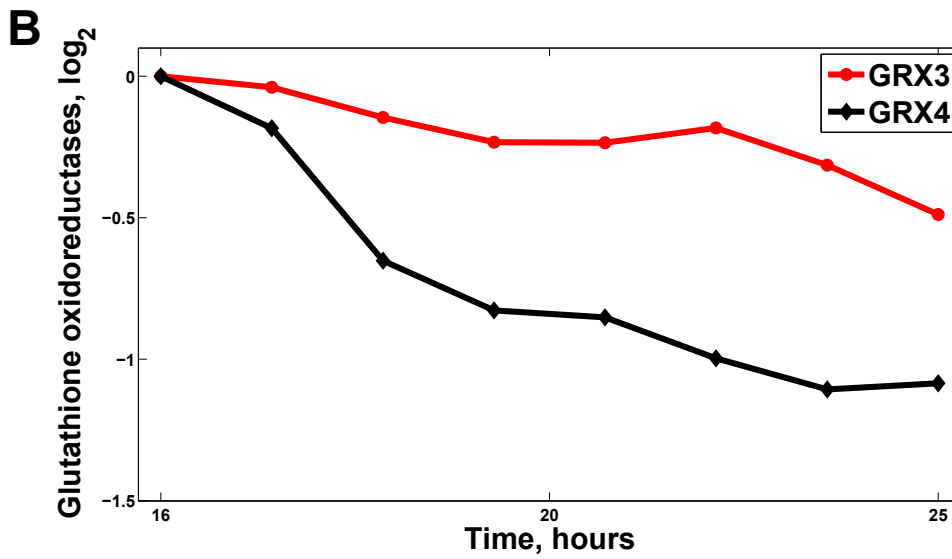

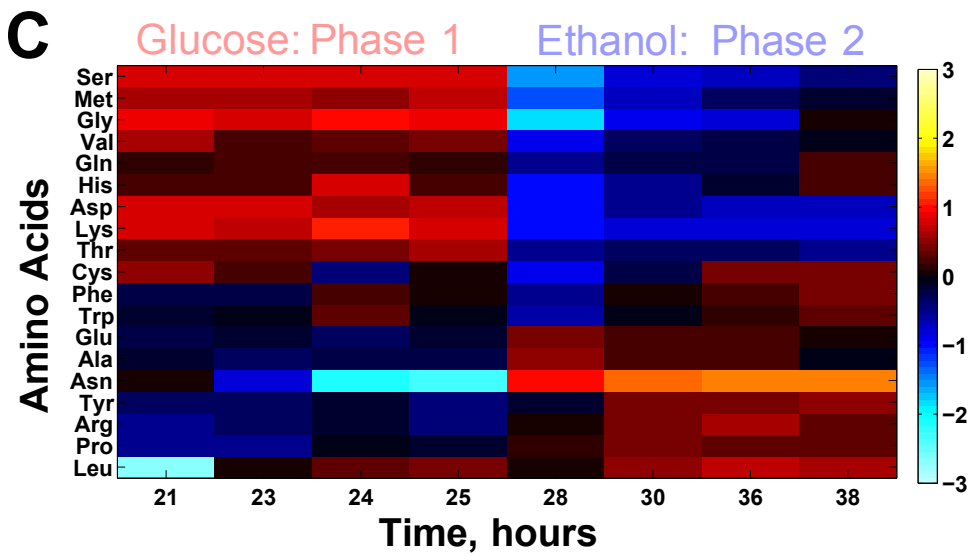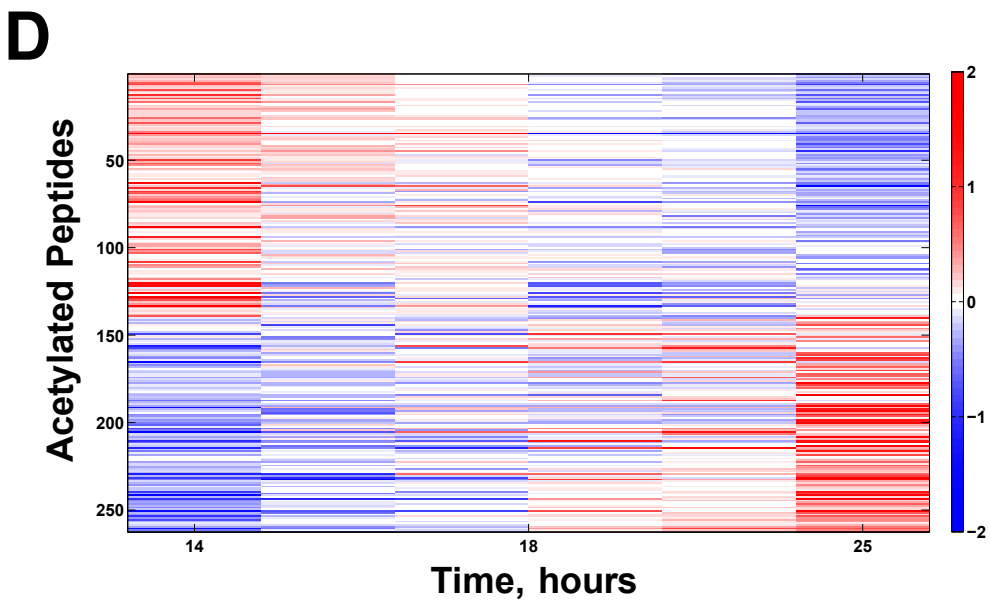

**Table S1. Transcription factors (TF) regulating the transcriptional response during the first phase of exponential growth at a constant rate**

| Gene Set <sup>a</sup>  | TF Name              | # TF Target Genes <sup>b</sup> | # Overlapping Genes <sup>c</sup> | p value <sup>d</sup> |
|------------------------|----------------------|--------------------------------|----------------------------------|----------------------|
| Repressed Genes (1356) | Gcn4p                | 152                            | 74                               | $< 10^{-20}$         |
|                        | Fhl1p                | 143                            | 63                               | $< 10^{-9}$          |
|                        | Bas1p                | 34                             | 21                               | $< 10^{-7}$          |
|                        | Met4p                | 11                             | 8                                | $< 10^{-4}$          |
|                        | Met32p               | 21                             | 12                               | $< 10^{-4}$          |
|                        | Aab1p                | 241                            | 74                               | $< 10^{-3}$          |
|                        | Gln3p                | 67                             | 26                               | $< 10^{-3}$          |
|                        | Sfp1p                | 32                             | 14                               | $< 10^{-3}$          |
|                        | Arg81p               | 15                             | 8                                | $< 10^{-3}$          |
|                        | Leu3p                | 21                             | 10                               | $< 10^{-3}$          |
|                        | Rap1p                | 105                            | 37                               | $< 10^{-3}$          |
|                        | Induced Genes (1163) | Fkh2p                          | 100                              | 37                   |
| Msn4p                  |                      | 73                             | 27                               | $< 10^{-4}$          |
| Msn2p                  |                      | 89                             | 30                               | $< 10^{-3}$          |
| Aft2p                  |                      | 89                             | 28                               | $< 10^{-3}$          |
| Aft1p                  |                      | 66                             | 21                               | $< 10^{-3}$          |

<sup>a</sup>Sets of genes (number in the set shown in parentheses) whose mRNA levels either increase or decrease during the first phase of exponential growth at FDR  $< 1\%$

<sup>b</sup>Number of genes regulated by the TF according to [MacIsaac et al. \(2006\)](#).

<sup>c</sup>Number of TF target genes found in the gene set.

<sup>d</sup>Probability for observing this or larger number of overlapping genes by chance.
